# Supplementary material
Source: PubMed Central journal article supplement (PMC4452569)
Supplement: EC.00038-15_zek999094439so1.pdf [file EC.00038-15_zek999094439so1.pdf]

## SUPPLEMENTARY FIGURES

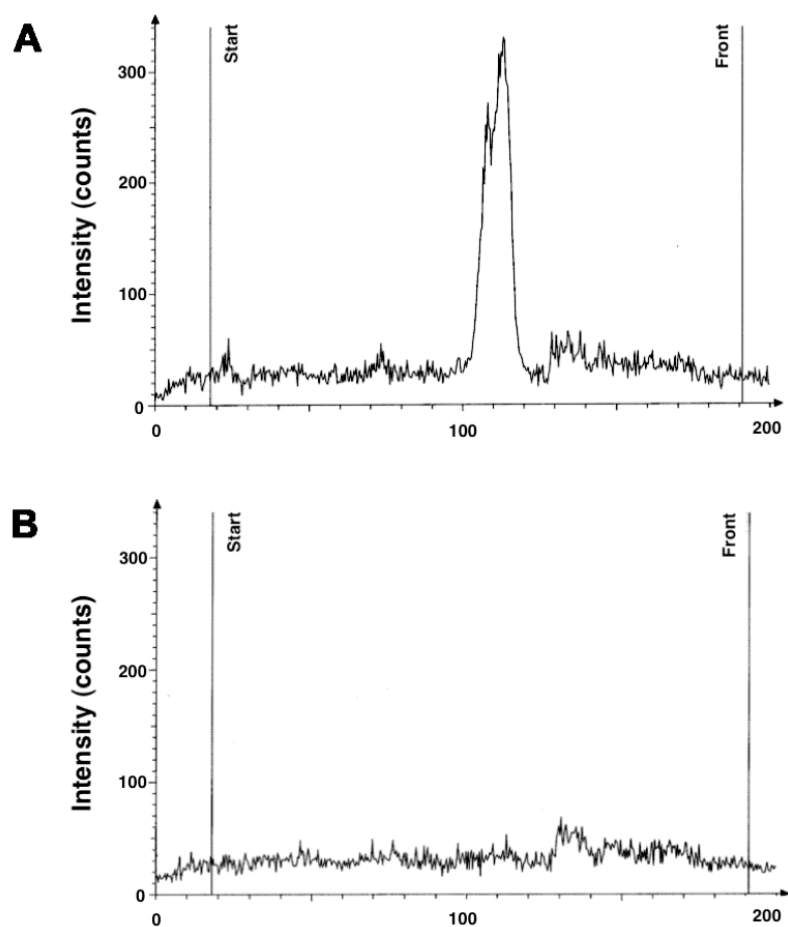

**Figure S1. Susceptibility of [ $^3\text{H}$ ]-labeled lipids to PI-PLC.** [ $^3\text{H}$ ]-labeled lipids were extracted from *T. brucei* bloodstream forms, incubated in the absence (upper panel) or presence (lower panel) of PI-PLC, and separated by one-dimensional TLC using solvent system 1. Radioactivity was detected by scanning the plate.

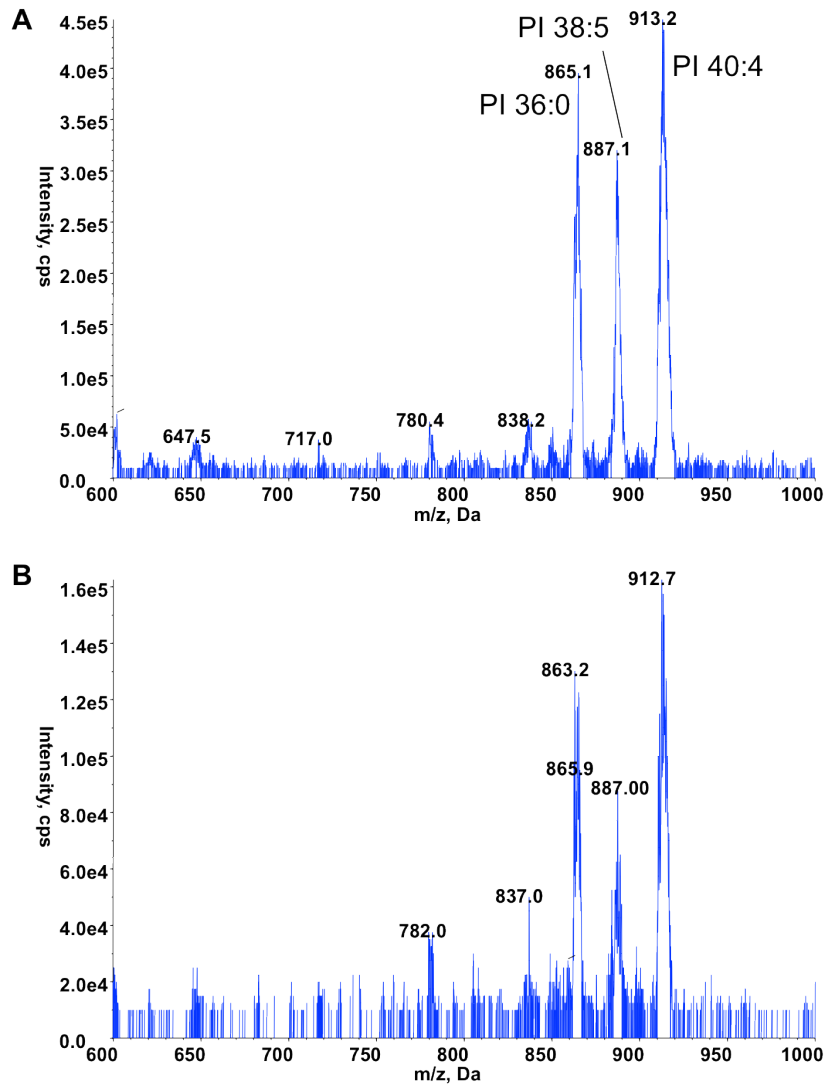

**Figure S2. Lipidomic analysis of inositol containing phospholipids from *T. brucei* TbHMIT RNAi knock-down cells by ES-MS-MS.** Lipid extracts from bloodstream form parasites incubated in the absence (A) or presence (B) of tetracycline for 48 hours were analyzed by negative ion ES-MS-MS utilising parent ion scans of 241 (600-1000m/z).

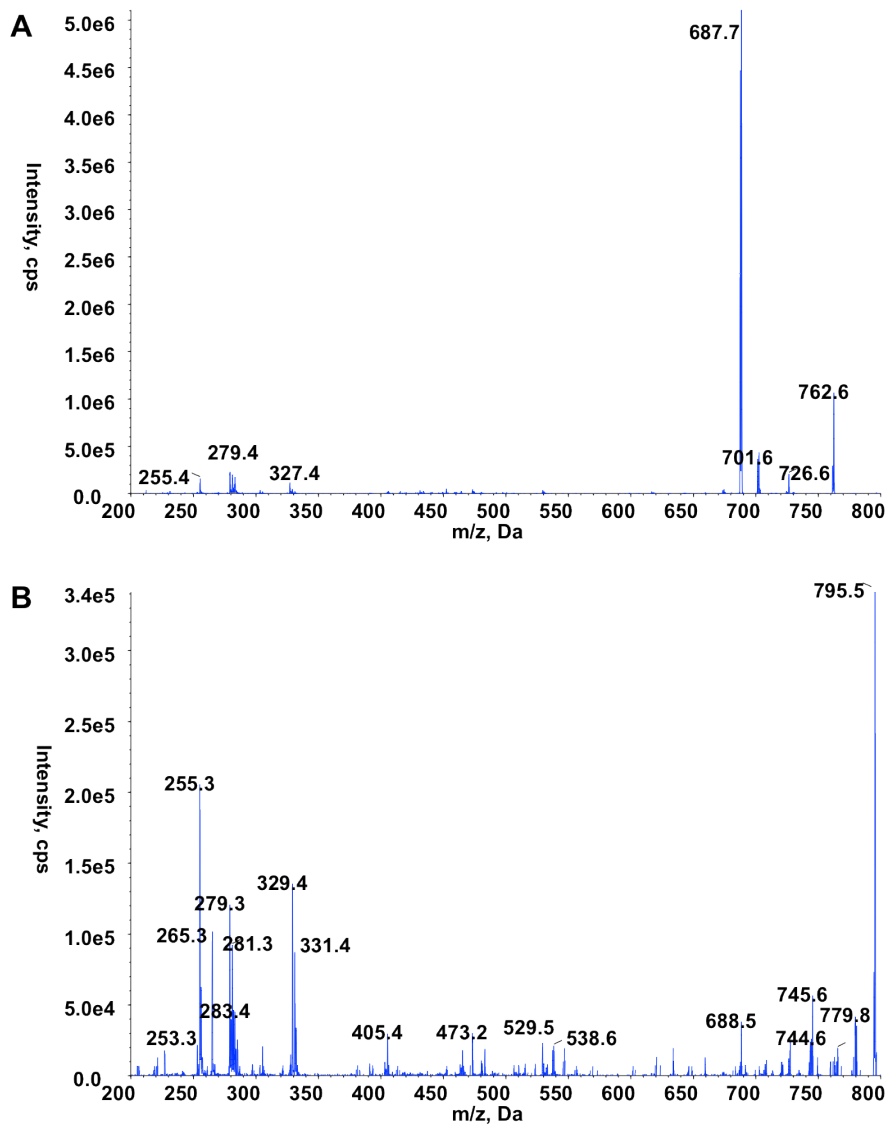

**Figure S3. Fragmentation of phospholipid species m/z 763 (A) and m/z 795 (B) from *T. brucei* TbHMIT RNAi knock-down cells by ES-MS-MS. Fragmentation reveals that (A) is mainly phosphatidylserine (34:0) and (B) is mainly phosphatidylglycerol (38:5).**

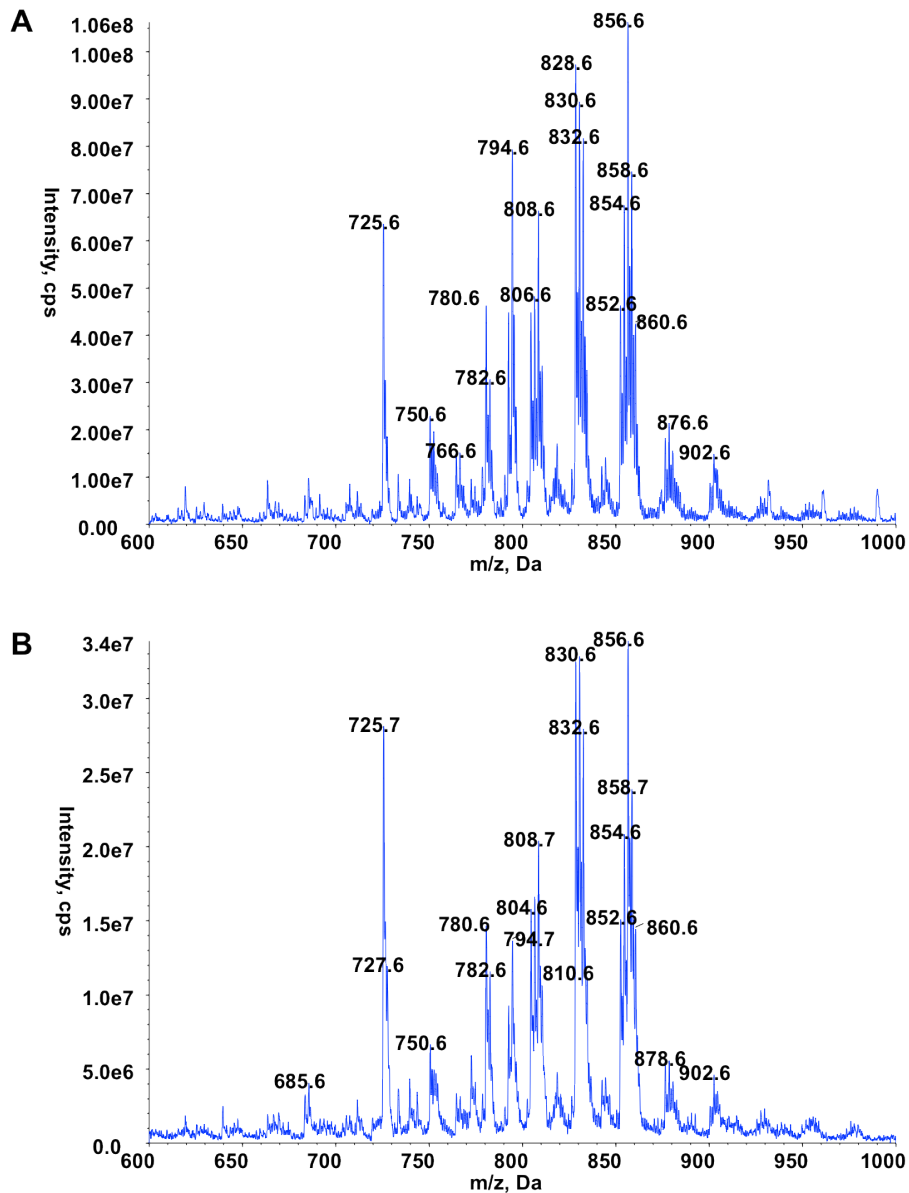

**Figure S4. Positive ion ES-MS lipidomic analysis of *T. brucei* TbHMIT RNAi knock-down cells.** Lipid extracts from bloodstream form parasites incubated in the absence (A) or presence (B) of tetracycline for 48 hours were analyzed by positive ion ES-MS survey scans (600-1000m/z).
